# Supplementary material for: Phosphate solubilizing microorganisms isolated from medicinal plants improve growth of mint
Source: PeerJ. 2022 Aug 17;10:e13782. doi: 10.7717/peerj.13782 (PMC9392447; doi:10.7717/peerj.13782)
Supplement: Supplemental Information 1 [file peerj-10-13782-s001.xlsx]

## Sheet: Sheet1
Supplementary Data 1: Recipe of Czapek agar Medium
Czapek agar Cz
Stock solution A		50mL
Stock solution B		50mL
Distilled water		900mL
Sucrose		30g
Agar		20g
Stock solution A:-
Sodium nitrate		40g
Potassium chloride		10g
Magnesium Sulphate		10g
Ferrous Sulphate		0.2g
Dissolved in litre distilled water and stored in refrigerator
K2HPO4-		20g
Dissolved in 1L water and stored in refrigerator to each 1L of medium
Added 1mL of both a+b
a) Zinc sulphate 1g in 100mL
b) Copper sulphate 0.5g in 100mL water
Autoclaved for 20min. at 121°C
Supplementary Table 1: Morphological characters of phosphate solubilizing bacteria on isolating PVK agar plates studied under stereomicroscope
	PSB	Colour	Surface form	Elevation	Margin	Surface texture	Gram staining	Shape
	AB	Off white	Circular	Convex	Entire	Smooth	+ ive	Rods
	B1	White	Circular	Raised	Undulate	Smooth	+ ive	Rods
	B2	Pink	circular	Raised	Entire	Smooth	- ive	Rods
	B3	White	Irregular	Flat	Undulate	Smooth	+ ive	Rods
	B4	White	Irregular	Flat	Entire	Smooth	- ive	Rods
	B5	White	Irregular	Raised	Undulate	Smooth	+ ive	Cocci
	B6	Transparent	Punchiform	Flat	Serrate	Smooth	Postitive	Rods
	CB1	Off white	Irregular	Flat	Serrate	Smooth	Negative	Rods
	CB2	White	Irregular	Raised	Serrate	Wrinkled	Negative	Rods
	CB3	White	Irregular	Raised	Entire	Rough	Negative	Rods
	CB4	Off white	Punchiform	Raised	Entire	Rough	Postitive	Rods
	CB5	White	Circular	Raised	Entire	Concentric	Negative	Cocci
	LB1	White	Filamentous	Flat	Undulate	Wrinkled	Postitive	Cocci
	LB2	White	Punchiform	Raised	Undulate	Smooth	Negative	Cocci
	LB3	White	Punchiform	Raised	Lobate	Rough	Negative	Rods
	LB4	Pink	Circular	Raised	Entire	Smooth	Negative	Cocci
	MB1	Pink	Irregular	Flat	Undulate	Smooth	Negative	Rods
	MB2	Off white	Irregular	Flat	Entire	Concentric	Negative	Rods
	MB3	Yellow	Circular	Raised	Entire	Smooth	Postitive	Rods
	MB4	Off white	Circular	Raised	Entire	Concentric	Negative	Cocci
	MB5	Yellow	Circular	Convex	Entire	Smooth	Negative	Rods
	MB6	Orange	Irregular	Raised	Undulate	Granular	Postitive	Rods
PSB: Phosphate Solubilizing Bacteria
Supplementary Table 2: colony morphology of phosphate solubilizing bacteria on Pikovskaya’s isolating agar plates
	Bacteria	Colour	Surface form	Elevation	Margins	Surface texture
	AB	Off white	Circular	Convex	Entire	Smooth
	BB1	Creamy white	Circular	Raised	Undulate	Wrinkle
	BB2	Pink	Circular	Raised	Entire	Smooth
	CB1	Off white	Irregular	Flat	Serrate	Smooth
	CB2	White	Irregular	Raised	Serrate	Wrinkled
	LB1	White	Filamentous	Flat	Undulate	Wrinkled
	LB2	White	Punchiform	Raised	Undulate	Smooth
	MB1	Pink	Irregular	Flat	Undulate	Smooth
	MB2	Off white	Irregular	Flat	Entire	Concentric
	MB3	Yellow	Circular	Raised	Entire	Smooth
AB: Aloe vera Bacteria; BB: Bauhinia Bacteria; CB: Cannabis Bacteria; LB: Lantana Bacteria; MB: Mentha Bacteria.
Supplementary Table 3: Gram staining and shapes of Phosphate Solubilizing Bacteria
	Bacteria	Gram staining	Shape
	AB	Gram positive	Rods
	BB1	Gram positive	Cocci
	BB2	Gram negative	Rods
	CB1	Gram negative	Rods
	CB2	Gram negative	Rods
	LB1	Gram positive	Cocci
	LB2	Gram negative	Cocci
	MB1	Gram negative	Rods
	MB2	Gram negative	Small Rods
	MB3	Gram positive	Small Rods
AB: Aloe vera Bacteria; BB: Bauhinia Bacteria; CB: Cannabis Bacteria; LB: Lantana Bacteria; MB: Mentha Bacteria.
Supplementary Table 4: Colony Diameter, Halozone Diameter and Solubilization Index of phosphate solubilizing Bacteria
PSB	Day1			Day2			Day3			Day4			Day5			Day6			Day7
	C.D	H.D	Si	C.D	H.D	Si	C.D	H.D	Si	C.D	H.D	Si	C.D	H.D	Si	C.D	H.D	Si	C.D	H.D	Si
AB	0.4	1	2.5	0.5	1	2	0.6	1.1	1.83	0.7	1.2	1.71	0.7	1.2	1.71	0.8	1.3	1.62	0.9	1.3	1.44
B1	0.5	0.6	1.2	0.6	0.7	1.16	0.6	0.9	1.5	0.7	1.2	1.9	0.8	1.6	2	0.9	1.7	1.88	1	1.9	1.9
B2	0.4	0.6	1.5	0.5	0.8	1.6	0.6	1	1.66	0.6	1.2	2	0.7	1.4	2	1	1.7	1.7	1.1	1.8	1.63
B3	0.5	0.7	1.4	0.6	0.9	1.5	0.6	1.1	1.83	0.7	1.5	2.14	0.8	1.8	2.25	1	1.9	1.9	1.1	2	1.81
B4	0.5	0.7	1.4	0.6	0.9	1.5	0.7	1.3	1.85	0.8	1.5	1.87	0.9	1.9	2.11	1	2	2	1.1	2.1	1.9
B5	0.3	0.8	2.66	0.3	0.9	3	0.4	1.2	3	0.5	1.4	2.8	0.5	1.7	3.4	0.7	1.9	2.71	1	2	2
B6	0.5	0.9	1.8	0.6	1	0.6	0.7	1.3	1.85	0.8	1.6	2	0.9	1.8	2	0.9	1.9	2.11	1	2	2
CB1	0.4	1	2.5	0.5	1.1	2.2	0.6	1.2	2	0.7	1.3	1.85	0.7	1.4	2	0.8	1.5	1.87	0.9	1.6	1.77
CB2	0.6	1.2	2	0.7	1.3	1.85	0.8	1.4	1.75	0.9	1.6	1.77	1	1.9	1.9	1.1	2	1.81	1.2	2.3	1.91
CB3	0.6	1.1	1.83	0.7	1.2	1.71	0.8	1.3	1.62	0.9	1.5	1.66	1	1.9	1.9	1	2	2	1.1	2.2	2
CB4	0.1	0.4	4	0.2	0.6	3	0.3	0.8	2.66	0.3	0.9	3	0.4	1	2.5	0.4	1.1	2.75	0.5	1.2	2.4
CB5	0.3	0.6	2	0.4	0.7	1.75	0.5	0.8	1.6	0.5	0.9	1.8	0.6	1	1.66	0.7	1.2	1.71	0.7	1.3	1.85
LB1	0.6	0.9	1.5	0.8	1	1.3	1	1.3	1.3	1.3	1.8	1.05	1.7	1.8	1,17	1.7	2	1.17	1.7	2	1.17
LB2	0.8	1.2	1.5	0.9	1.3	1.44	1.1	1.4	1.27	1.3	1.7	1.3	1.4	1.8	1.28	1.5	1.9	1.26	1.6	2	1.25
LB3	0.3	0.9	3	0.5	1	2	0.7	1.4	2	0.8	1.7	2.12	0.8	1.8	2.25	0.8	1.8	2.25	0.8	2	2.5
LB4	1	1.1	1.1	1.1	1.2	1.09	1.2	1.4	1.16	1.2	1.5	1.25	1.4	1.7	1.21	1.5	1.9	1.26	1.7	2.1	1.23
MB1	0.5	0.9	1.8	0.9	1.1	1.22	1	1.3	1.3	1.2	1.5	1.25	1.4	1.7	1.21	1.5	1.9	1.26	1.6	2	1.25
MB2	1	1.3	1.3	1.2	1.5	1.25	1.3	1.6	1.23	1.3	1.6	1.23	1.4	1.7	1.21	1.5	1.8	1.2	1.5	1.9	1.26
MB3	0.6	1	1.66	0.8	1.1	1.37	0.8	1.1	1.37	0.9	1.2	1.33	1	1.3	1.3	1.1	1.4	1.27	1.1	1.5	1.36
MB4	0.9	1	1.11	1	1.2	1.2	1.2	1.4	1.16	1.2	1.5	1.25	1.3	1.6	1.23	1.4	1.6	1.14	1.5	1.7	1.13
MB5	1.1	2	1.8	1.4	2.5	1.78	1.5	2.7	1.8	1.6	2.9	1.81	1.8	3.2	1.77	2	3	1.5	2.2	3.2	1.45
MB6	1	1.2	1.2	1.1	1.4	1.2	1.3	1.6	1.23	1.4	1.8	1.28	1.5	1.9	1.26	1.6	2	1.25	1.7	2.2	1.29
C.D: Colony Diameter; H.D: Halozone Diameter; Si: Solubilization Index; PSB: Phosphate Solubilizing Bacteria
Supplementary Table 5: Colony Diameter, Halozone Diameter and Solubilization Index of Phosphate Solubilizing Fungi
PSF	Day1			Day2			Day3			Day4			Day5			Day6			Day7
	C.D	H.D	Si	C.D	H.D	Si	C.D	H.D	Si	C.D	H.D	Si	C.D	H.D	Si	C.D	H.D	Si	C.D	H.D	Si
AF1	0.5	0.9	1.8	0.6	1	1.66	0.7	1.2	1.71	0.9	1.4	1.55	1	1.5	1.5	1.2	1.6	1.33	1.3	1.8	1.38
AF2	1.5	1.7	1.13	1.5	1.8	1.2	1.6	1.9	1.18	1.7	2	1.17	1.8	2.2	1.22	1.9	2.4	1.26	2.1	2.6	1.23
AF3	0.7	1.5	2.14	0.8	1.7	2.12	1	2	2	1.2	2.1	1.75	1.3	2.4	1.86	1.5	2.7	1.8	1.6	2.9	1.81
AF4	0.6	1	1.66	0.7	1	1.42	0.8	1.1	1.37	0.9	1.2	1.33	1	1.3	1.3	1.1	1.5	1.36	1.3	1.7	1.3
AF5	2	2.2	1.1	2	2.4	1.2	2.1	2.6	1.23	2.2	2.8	1.27	2.3	2.9	1.26	2.4	3	1.25	2.6	3.4	2.3
BF1	0.5	1	0.5	1	1.3	1.3	1.5	2	1.33	1.9	1.5	1.31	2.6	2.9	1.11	3	3.3	1.1	3.4	3.7	1
BF2	1	1.5	1.5	1.3	2	1.53	1.9	2.2	1.15	2	2.5	1.25	2.2	2.6	1.18	2.3	2.8	1.21	2.5	2.9	1.16
CF1	1	1.5	1.5	1.5	2	1.33	2	2.5	1.25	2.2	2.7	1.22	2.5	3	1.2	2.6	3.2	1.23	2.8	3.5	1.25
CF2	3	4.5	1.5	4	5.3	1.32	4.5	6	1.33	5.5	6.5	1.18
LF1	1	4.8	4.8	2	5.3	2.65	3	5.7	1.9	4	7.5	1.87	6.5	8	1.23
LF2	1.3	2	1.53	1.8	2.3	1.27	3	4.3	1.43	4	6	1.5	5.7	8	2.4
LF3	3.8	4.9	1.28	4.3	5.2	1.2	4.5	5.3	1.17	5	6.5	1.3	6	7.5	1.25	6.3	7.5	1.19
MF1	0.7	1	0.7	0.9	1.2	1.33	1	1.7	1.7	2	2.5	1.25	2.5	2.8	1.12	2.9	3.2	1.1	3	3.5	1.16
MF2	0.6	1	0.6	0.8	1.2	1.5	0.9	1.5	1.66	1	1.9	1.9	1.5	2	1.33	1.8	2.5	1.38	2	3	1.5
MF3	2	2.2	1.1	2.2	2.4	1.09	3	3.7	1.23	4	4.3	1.07	5	5.5	1.1	5	5.5	1.1
C.D: Colony Diameter; H.D: Halozone Diameter; Si: Solubilization Index; PSF: Phosphate Solubilizing Fungi
Supplementary Table 6: pH decrease by PSM of PVK broth medium within seven days
	PSM	Day 1	Day 2	Day 3	Day 4	Day 5	Day 6	Day 7
	AB	7	5.47	4.72	4.33	3.73	3.67	3.62
	B1	7	7.5	7.37	6.22	5.69	5.29	3.61
	B2	7	6.46	6.33	5.57	3.92	3.84	3.18
	B3	7	5.56	5.42	3.47	3.17	6.04	6.05
	B4	7	6.6	6.55	6.51	5.37	3.8	3.33
	B5	7	4.44	3.47	3.46	3.45	3.44	3.35
	B6	7	4.09	3.56	3.47	3.61	3.6	3.6
	CB1	7	5.57	3.5	3.5	3.48	3.47	3.46
	CB2	7	6.48	6.43	5.78	5.48	4.99	4.92
	CB3	7	5.74	5.32	5.12	5.05	4.98	4.96
	CB4	7	5.12	3.13	3.11	3.09	3.09	3
	CB5	7	6.01	5.99	5.97	5.96	5.75	5.32
	LB1	7	6.58	5.87	5.65	5.6	4.86	4.6
	LB2	7	5.43	5.02	5	4.45	4.26	4.26
	LB3	7	3.64	3.28	3.27	3.24	3.22	3.2
	LB4	7	5.05	4.8	4.55	4.54	4.52	4.36
	MB1	7	6.8	6.56	6.42	6.35	5.98	6.13
	MB2	7	5.98	5.92	5.94	5.92	4.33	4.2
	MB3	7	6.39	5.47	5.11	4.85	4.39	4.21
	MB4	7	6.66	6.65	6.45	5.75	5.41	5.4
	MB5	7	6.19	6.14	5.88	5.12	4.98	4.82
	MB6	7	6.67	6.54	6.3	5.09	4.45	4.19
	AF1	7	5.83	5.19	4.34	3.84	3.39	3.26
	AF2	7	6.66	5.92	5.69	5.55	4.53	4.25
	AF3	7	6.06	5.6	5.44	4.97	4.38	4.26
	AF4	7	5.26	5.16	4.97	4.42	4.33	4
	AF5	7	7	5.14	4.47	4.25	4.12	4.11
	BF1	7	6.49	5.45	4.53	4.8	4.28	4.18
	BF2	7	5.9	5.42	5.23	5.11	4.79	4.62
	CF1	7	6.06	6.01	6.23	6.21	6.01	6.01
	CF2	7	5.44	3.25	3.12	3.58	3.27	3.12
	LF1	7	6.3	4.5	4.37	4.32	4.24	4.24
	LF2	7	6.53	6.33	6.23	6.21	6.19	4.56
	LF3	7	6.36	6.2	5.78	5.5	5.44	5.09
	MF1	7	6.84	5.8	5.34	4.22	3.73	3.25
	MF2	7	4.99	4.43	4.35	4.02	5.98	5.99
	MF3	7	5.16	4.83	4.75	4.57	4.18	4.05
